# Supplementary material
Source: PubMed Central journal article supplement (PMC4123631)
Supplement: NIHMS608778-supplement-supplement_1.pdf [file NIHMS608778-supplement-supplement_1.pdf]

## **SUPPORTING INFORMATION**

### **UV-Modulated Substrate Rigidity for Multiscale Study of Mechanoresponsive Cellular Behaviors**

Yubing Sun<sup>1,2</sup>, Liang-Ting Jiang<sup>1,2</sup>, Ryoji Okada<sup>1,3</sup>, and Jianping Fu<sup>1,2,4,\*</sup>

<sup>1</sup>Integrated Biosystems and Biomechanics Laboratory, University of Michigan, Ann Arbor, MI 48109, USA; <sup>2</sup>Department of Mechanical Engineering, University of Michigan, Ann Arbor, MI 48109, USA; <sup>3</sup>Department of Aerospace Engineering, University of Michigan, Ann Arbor, MI 48109, USA; <sup>4</sup>Department of Biomedical Engineering, University of Michigan, Ann Arbor, MI 48109, USA.

\*Correspondence should be addressed to J. Fu [J. Fu (email address: [jpfu@umich.edu](mailto:jpfu@umich.edu), Tel: 01-734-615-7363, Fax: 01-734-647-7303)].

**SUPPORTING SCHEME**  
**Supporting Scheme S1**

(a) Benzophenone radical generation

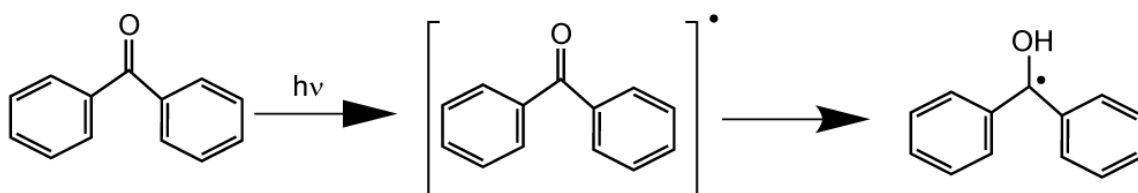

(b) Crosslinker reaction

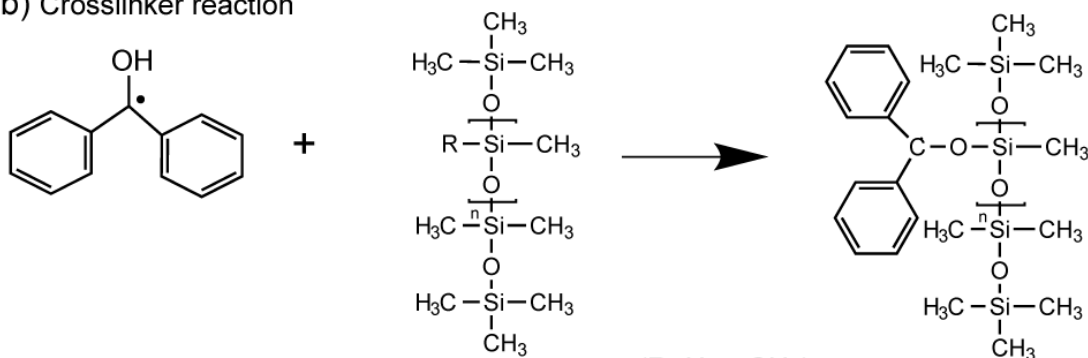

(c) Monomer reaction

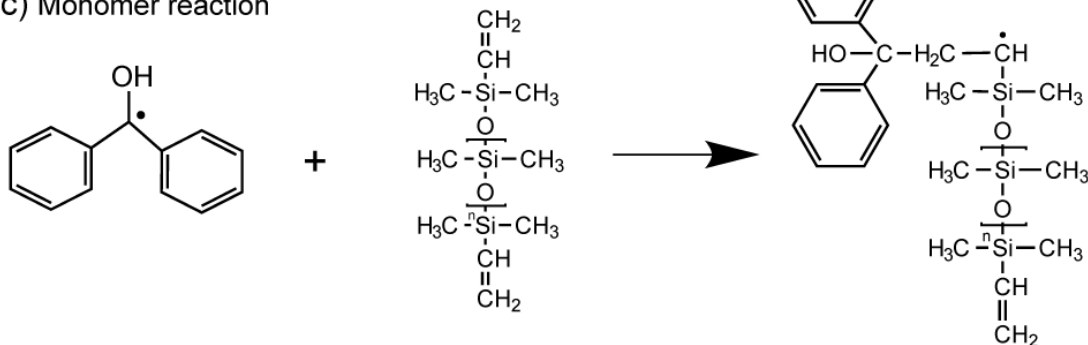

**Scheme S1.** Benzophenone radical generation mechanism under UV light exposure.

**SUPPORTING FIGURES**  
**Supporting Figure S1**

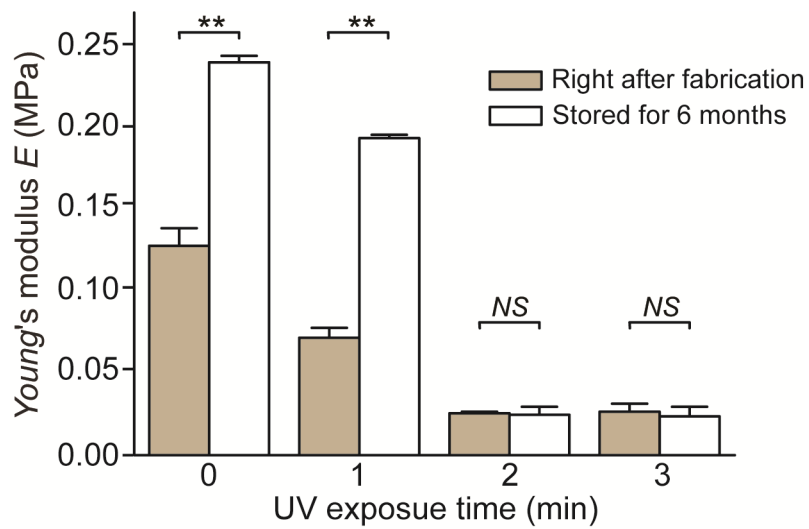

**Figure S1.** Bar plot of *Young's modulus E* of 1:30 photoPDMS post-exposure baked for 20 min. Tensile testing was performed either right after sample fabrication or after a 6-month storage at room temperature, as indicated. \*\*,  $p < 0.01$ . NS, statistically not significant ( $p > 0.05$ ).

**Supporting Figure S2**

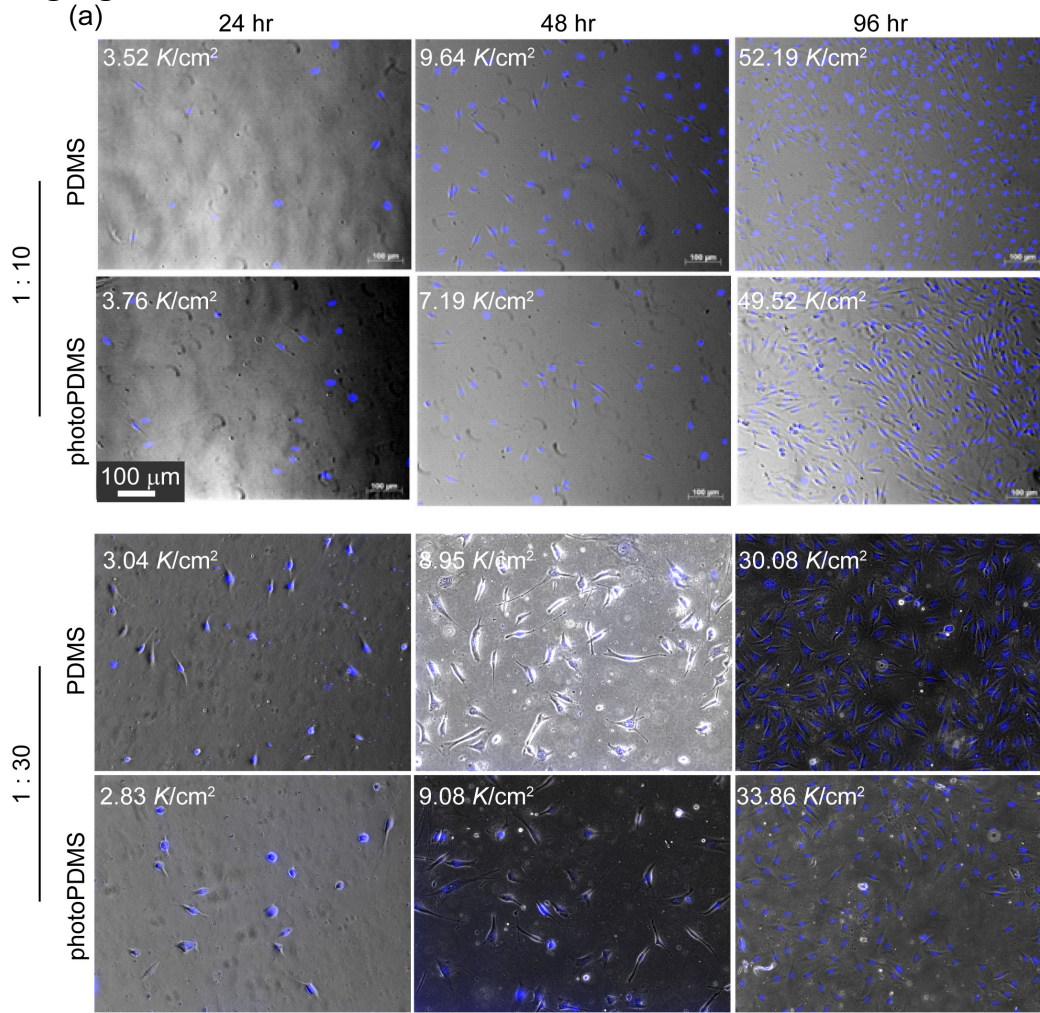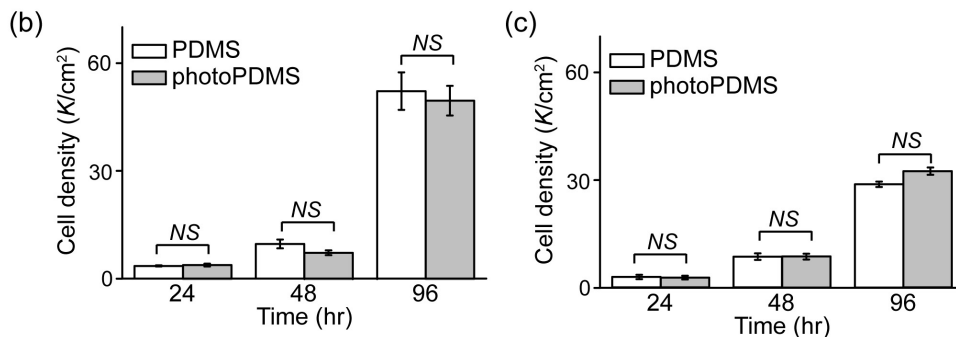

**Figure S2.** Cell proliferation assays on both PDMS and photoPDMS (with 0 min UV exposure) substrates. NIH/3T3 cells were plated at a density of 3,000 cells/cm<sup>2</sup>. (a) Representative images of NIH/3T3 stained with DAPI (blue) after 24, 48, and 96 hr of culture on 1:10 PDMS and photoPDMS (top) and 1:30 PDMS and photoPDMS (bottom) substrates. (b-c) Bar plot showing density of NIH/3T3 cells as a function of culture time. Data represents the means  $\pm$  s.e.m from 3 independent experiments. *NS*, statistically not significant ( $p > 0.05$ ).

### Supporting Figure S3

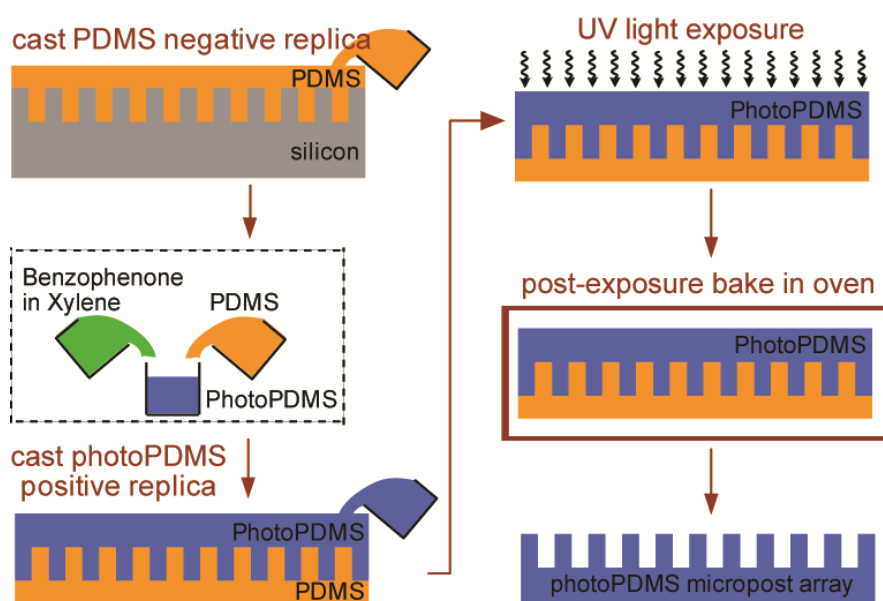

**Figure S3.** Fabrication process of photoPDMS micropost array.

## Supporting Figure S4

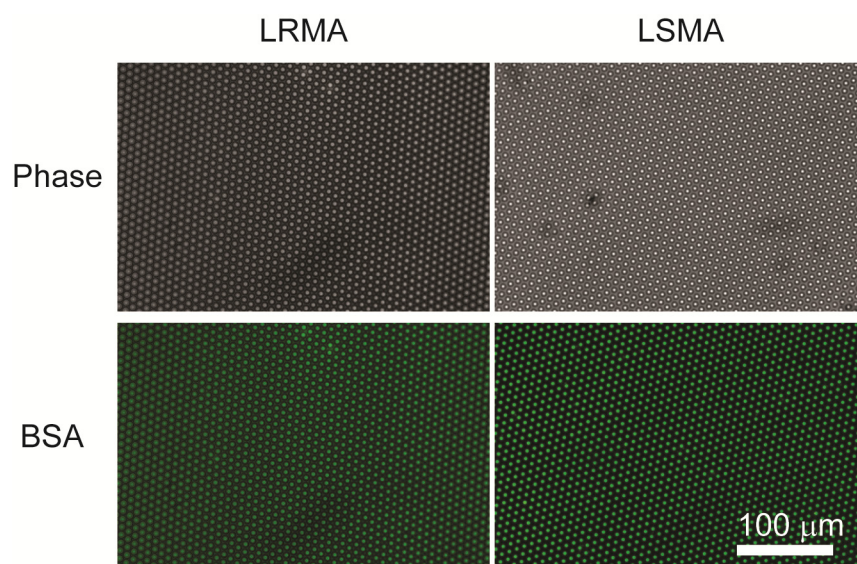

**Figure S4.** Phase (top) and fluorescent (bottom) images showing constant surface protein densities on LRMA and LSMA.  $50 \mu\text{g mL}^{-1}$  Alexa-488 conjugated BSA was printed onto the tops of LRMA and LSMA using microcontact printing.
